# Supplementary material for: Coffee Drinking and Adverse Physical Outcomes in the Aging Adult Population: A Systematic Review
Source: MDPI journal article supplement (doi:10.3390/metabo12070654), 2022-07-15
Supplement: s1 [file s1]

## Supplementary Material

**Supplementary Table S1.** Overview of quality ratings within selected studies. (N=10)

| Authors                    | % of<br>YES | % of<br>NO | % of Not<br>reported | % of<br>Not Ap-<br>plicable | Qual-<br>ity* |
|----------------------------|-------------|------------|----------------------|-----------------------------|---------------|
| Wang T. 2020               | 50          | 0          | 14                   | 36                          | Poor          |
| Chung H. 2017              | 50          | 0          | 14                   | 36                          | Poor          |
| Kim JH. 2017               | 50          | 0          | 14                   | 36                          | Poor          |
| Kobayashi S. 2014          | 50          | 0          | 14                   | 36                          | Poor          |
| Iwasaka C. 2021            | 50          | 0          | 14                   | 36                          | Poor          |
| Huang WC. 2021             | 36          | 14         | 14                   | 36                          | Poor          |
| Machado-Fragua M. 2018     | 79          | 0          | 14                   | 7                           | Good          |
| Verlinden VJA. 2016        | 57          | 0          | 7                    | 36                          | Fair          |
| Machado-Fragua MD.<br>2019 | 57          | 0          | 7                    | 36                          | Fair          |
| Jyvakorpi SK. 2020         | 43          | 7          | 14                   | 36                          | Poor          |

\*The quality was set according to the total score: 0-5 (Poor) , 6-10 (fair) and 11-14 (Good).

**Supplementary Table S2.** Search strategy used in the US National Library of Medicine (PubMed) and Medical Literature Analysis and Retrieval System Online (MEDLINE) and adapted to the other sources, according to selected descriptors.

**Research Question:** What is the association between coffee drinking and adverse physical outcomes in the adult aging population?

**Sources:** PubMed, MEDLINE, EMBASE, Scopus, Ovid, and Google Scholar.

**Limitations:** “Human”

**Grey literature:** <https://arxiv.org/>. Furthermore, <https://www.base-search.net/> was used to avoid publication bias in terms of contradictory and negative results reports, especially in a grey research question such as the one we selected.

**Search Date:** Inception to May 31<sup>st</sup>, 2022.

| N. | Searches                                                                                                                                                                                           | Results   |
|----|----------------------------------------------------------------------------------------------------------------------------------------------------------------------------------------------------|-----------|
| #1 | (“Intake”[tiab]) OR (“Consumption”[tiab])                                                                                                                                                          | 586,931   |
| #2 | (“Sarcopenia”[tiab]) OR (“Frailty”[tiab]) OR (“Fall*”[tiab]) OR (“Gait”[tiab]) OR (“Mobility”[tiab]) OR (“ADL”[tiab]) OR (“IADL”[tiab]) OR (“Disability”[tiab]) OR (“Functional Impairment”[tiab]) | 666,601   |
| #3 | (“Coffee”[tiab])                                                                                                                                                                                   | 16,970    |
| #4 | (“Review”[tiab]) OR (“Systematic review”[tiab])OR (“Narrative review”[tiab])) OR (“Meta-analysis”[tiab])                                                                                           | 3,876,458 |
| #5 | #1 AND #2 AND #3 NOT #4                                                                                                                                                                            | 284       |
